# Supplementary material
Source: MDPI journal article supplement (https://www.mdpi.com/2073-4441/13/19/2788)
Supplement: s1 [file s1 › water-1381330-supplementary.pdf]

# Systematic review of flood and drought literature based on science mapping and content analysis – APPENDIX

Siavash Fasihi <sup>1,\*</sup>, Andy Lim <sup>1</sup>, Wenyan Wu <sup>1</sup> and David Proverbs <sup>2</sup>

<sup>1</sup> School of Engineering and the Built Environment, Birmingham City University; Birmingham, B4 7XG, United Kingdom.andy.lim@bcu.ac.uk (W.Z.L.); wenyan.wu@bcu.ac.uk (W.W.)

<sup>2</sup> Faculty of Science and Engineering, University of Wolverhampton; Wolverhampton, WV1 1LY, United Kingdom david.proverbs@wlv.ac.uk (D.P.)

\* Correspondence: siavash.fasihi@bcu.ac.uk

Table S1 represents a list of the abbreviations for the methods and indices used in the literature. These terms are used by the original authors and extracted by the content analysis approach.

**Table S1.** List of the abbreviations derived from the studied literature some of which might have been shown in the figures.

|                                                                                                                                                                                                                                                                                                                                                                                                                                                                                                                                                                                                                                                                                                                                                                                                                                                                                                                                                                                                                                                                                                                                                                                                                                                                                                                                                                                                              |                                                                                                                                                                                                                                                                                                                                                                                                                                                                                                                                                                                                                                                                                                                                                                                                                                                                                                                                                                                |
|--------------------------------------------------------------------------------------------------------------------------------------------------------------------------------------------------------------------------------------------------------------------------------------------------------------------------------------------------------------------------------------------------------------------------------------------------------------------------------------------------------------------------------------------------------------------------------------------------------------------------------------------------------------------------------------------------------------------------------------------------------------------------------------------------------------------------------------------------------------------------------------------------------------------------------------------------------------------------------------------------------------------------------------------------------------------------------------------------------------------------------------------------------------------------------------------------------------------------------------------------------------------------------------------------------------------------------------------------------------------------------------------------------------|--------------------------------------------------------------------------------------------------------------------------------------------------------------------------------------------------------------------------------------------------------------------------------------------------------------------------------------------------------------------------------------------------------------------------------------------------------------------------------------------------------------------------------------------------------------------------------------------------------------------------------------------------------------------------------------------------------------------------------------------------------------------------------------------------------------------------------------------------------------------------------------------------------------------------------------------------------------------------------|
| DFA: Detrended Fluctuation Analysis<br>WSC: Water Storage Change<br>ONI: Oceanic Nina Index<br>WSDI: Warm Spell Duration index<br>CDD: Maximum length of dry spell<br>MATSIRO: Minimal Advanced Treatments of Surface Interaction and Runoff<br>TRIP: Total Runoff Integrating Pathways<br>GWD LR: Global Width Database for Large 495 Rivers<br>CaMa Flood: Catchment Based Macro scale Floodplain<br>MIROC: Model for Interdisciplinary Research on Climate<br>SDII: Simple Daily Intensity Index<br>EASMI: East Asian Summer Monsoon Index<br>WASP: Weighted Anomaly of Standardized Precipitation<br>CDFM: Cumulative Departure from<br>Q: quadrant (used in some policy framework definitions)<br>DFSAI: drought/flood sudden alternation index<br>NSE: Nash and Sutcliffe efficiency index<br>PWQDC: potential water quality deterioration<br>LTMM: Long Term Monthly Mean<br>SSARR: Streamflow Synthesis and Reservoir Regulation<br>SPIsERS: SPIs+Evapotranspiration+Runoff+Soil<br>DPSIR: Driver–Pressure–State–Impact–Response<br>HSPF: Hydrological Simulation Program — Fortran<br>CGCM3: Canadian Global Coupled Model<br>CBDRI: Community Based Disaster Risk Index<br>EQWIN: Equatorial zonal Wind Index<br>WWV: Warm Water Volume<br>ISMR: Indian Summer Monsoon Rainfall<br>PWM: Probability Weighted Moments<br>ASS: Average Suspended Sediments<br>IDW: Inverse Distance squared Weighted | SSM: Surface Soil Moisture<br>DFI: Drought and Flood Index<br>DFY: Drought/Flood Year<br>RL: drought hazard<br>CDD: Consecutive Dry Days<br>GCM: General Circulation Model<br>DFC: Drought Flood Coexistence<br>Dt: total potential disruption<br>GRDC: Global Runoff Data Center<br>GPD: General Pareto Distribution<br>Q90: 90% discharge<br>IFR: Instream Flow Requirements<br>SPGI: Squared Poverty Gap Index<br>PHCR: poverty head count ratio<br>PGI: Poverty Gap index<br>VaR: Value at Risk<br>KNN: K-nearest neighbor<br>WEIC: watershed evaluation index<br>PDDC: potential drought damage<br>PFDC: potential flood damage<br>ES: Ecosystem Services<br>RWL: Restricted water Level<br>Mf: flood memory<br>Md: drought memory<br>ML: Maximum Likelihood<br>PDS: Partial Duration Series<br>EV: Extreme Value<br>GP: Generalised Pareto<br>GEV: Generalised Extreme Value<br>SWI: Soil water Index<br>T: Temperature<br>P: Precipitations<br>FDI: Flood Drought Index |
|--------------------------------------------------------------------------------------------------------------------------------------------------------------------------------------------------------------------------------------------------------------------------------------------------------------------------------------------------------------------------------------------------------------------------------------------------------------------------------------------------------------------------------------------------------------------------------------------------------------------------------------------------------------------------------------------------------------------------------------------------------------------------------------------------------------------------------------------------------------------------------------------------------------------------------------------------------------------------------------------------------------------------------------------------------------------------------------------------------------------------------------------------------------------------------------------------------------------------------------------------------------------------------------------------------------------------------------------------------------------------------------------------------------|--------------------------------------------------------------------------------------------------------------------------------------------------------------------------------------------------------------------------------------------------------------------------------------------------------------------------------------------------------------------------------------------------------------------------------------------------------------------------------------------------------------------------------------------------------------------------------------------------------------------------------------------------------------------------------------------------------------------------------------------------------------------------------------------------------------------------------------------------------------------------------------------------------------------------------------------------------------------------------|

|                                                                                                                                                                                                                                                                                                                                                                                                                                                                                                                                                                                                                                                                                                                                                                                                                                                                                                                                                                                                                                                                                                                                           |                                                                                                                                                                                                                                                                                                                                                                                                                                                                                                                                                                                                                                                                                                                                                    |
|-------------------------------------------------------------------------------------------------------------------------------------------------------------------------------------------------------------------------------------------------------------------------------------------------------------------------------------------------------------------------------------------------------------------------------------------------------------------------------------------------------------------------------------------------------------------------------------------------------------------------------------------------------------------------------------------------------------------------------------------------------------------------------------------------------------------------------------------------------------------------------------------------------------------------------------------------------------------------------------------------------------------------------------------------------------------------------------------------------------------------------------------|----------------------------------------------------------------------------------------------------------------------------------------------------------------------------------------------------------------------------------------------------------------------------------------------------------------------------------------------------------------------------------------------------------------------------------------------------------------------------------------------------------------------------------------------------------------------------------------------------------------------------------------------------------------------------------------------------------------------------------------------------|
| <p>MOWCATL: Minimal Occurrences With Constraints And Time Lags</p> <p>DWAAI: Dry-Wet Abrupt Alternation Index</p> <p>SCCS: Standard Cross-Cultural Sample</p> <p>MSME: Micro Small and Medium Enterprise</p> <p>GAR: Global Assessment Report on Disaster Risk Reduction<br/>j: time-related extreme rainfall indices</p> <p>GRDC: Global Runoff Data Center (observed data used as a comparison against modelled by watergap)</p> <p>WPSH: Western Pacific Subtropical High</p> <p>SDI: Spatial Data Infrastructure</p> <p>CMIP5: Coupled Model Intercomparison Project Phase 5</p> <p>WGEN: Weather Generator Model</p> <p>F: Encounter probability of flood occurrence</p> <p>D: Encounter probability of drought occurrence</p> <p>DFDMI: Drought and Flood Disaster Measurement Index</p> <p>UTFI: Underground Taming of Floods for irrigation</p> <p>SPI: Standardized Precipitation Index</p> <p>SDSM: Statistical Downscaling Model</p> <p>AGCM: Atmospheric General Circulation Model</p> <p>LECZ: Low Elevation Coastal Zone</p> <p>GRACE: Gravity Recovery and Climate Experiment</p> <p>WSDI: Water Deficit/Surplus Index</p> | <p>SOI: Southern Oscillation Index</p> <p>CRM: Climate Risk Management</p> <p>DRM: Disaster Risk Management</p> <p>CCA: Climate Change Adaptation</p> <p>SSN: Sunspot Number</p> <p>DSI: Drought Severity Index</p> <p>PET: Potential Evapotranspiration</p> <p>HW: Heat Wave</p> <p>ESM: Earth System Model</p> <p>SST: Sea Surface Temperature</p> <p>FDC: Flood Duration Curve</p> <p>DDC: Drought Duration Curve</p> <p>PWT: Pre-Whitening Trend</p> <p>Q-Q Plots: Quantile-Quantile plots</p> <p>CDD: Consecutive Dry Days</p> <p>CWD: Consecutive Wet Days</p> <p>GLDAS: Global Land Data Assimilation System</p> <p>TRMM: Tropical Rainfall Measuring Mission</p> <p>TWS: Terrestrial water storage</p> <p>EWB: Equivalent Water Height</p> |
|-------------------------------------------------------------------------------------------------------------------------------------------------------------------------------------------------------------------------------------------------------------------------------------------------------------------------------------------------------------------------------------------------------------------------------------------------------------------------------------------------------------------------------------------------------------------------------------------------------------------------------------------------------------------------------------------------------------------------------------------------------------------------------------------------------------------------------------------------------------------------------------------------------------------------------------------------------------------------------------------------------------------------------------------------------------------------------------------------------------------------------------------|----------------------------------------------------------------------------------------------------------------------------------------------------------------------------------------------------------------------------------------------------------------------------------------------------------------------------------------------------------------------------------------------------------------------------------------------------------------------------------------------------------------------------------------------------------------------------------------------------------------------------------------------------------------------------------------------------------------------------------------------------|

The following is the list of 119 selected papers for the systematic review.

Abelen, S., Seitz, F., Abarca-del-Rio, R. and Güntner, A., 2015. Droughts and floods in the La Plata basin in soil moisture data and GRACE. *Remote Sensing*, 7(6), pp.7324-7349.

Ali, S.M., Khalid, B., Akhter, A., Islam, A. and Adnan, S., 2020. Analyzing the occurrence of floods and droughts in connection with climate change in Punjab province, Pakistan. *Natural Hazards*, 103, pp.2533-2559.

Amarasinghe, U., Amarnath, G., Alahacoon, N. and Ghosh, S., 2020. How Do Floods and Drought Impact Economic Growth and Human Development at the Sub-National Level in India?. *Climate*, 8(11), p.123.

Arshad, M., Amjath-Babu, T.S., Kächele, H. and Müller, K., 2016. What drives the willingness to pay for crop insurance against extreme weather events (flood and drought) in Pakistan? A hypothetical market approach. *Climate and Development*, 8(3), pp.234-244.

Ayugi, B., Tan, G., Niu, R., Dong, Z., Ojara, M., Mumo, L., Babaousmail, H. and Ongoma, V., 2020. Evaluation of meteorological drought and flood scenarios over Kenya, East Africa. *Atmosphere*, 11(3), p.307.

Berton, R., Driscoll, C.T. and Adamowski, J.F., 2017. The near-term prediction of drought and flooding conditions in the northeastern United States based on extreme phases of AMO and NAO. *Journal of Hydrology*, 553, pp.130-141.

Bi, W., Weng, B., Yuan, Z., Yang, Y., Xu, T., Yan, D. and Ma, J., 2019. Evolution of drought–flood abrupt alternation and its impacts on surface water quality from 2020 to 2050 in the Luanhe River Basin. *International journal of environmental research and public health*, 16(5), p.691.

Biswas, T.K. and Mosley, L.M., 2019. From mountain ranges to sweeping plains, in droughts and flooding rains; River Murray water quality over the last four decades. *Water Resources Management*, 33(3), pp.1087-1101.

- Bonnafeous, L., Lall, U. and Siegel, J., 2017. A water risk index for portfolio exposure to climatic extremes: Conceptualization and an application to the mining industry. *Hydrology and Earth System Sciences*, 21(4), pp.2075-2106.
- Bola Bosongo, G., Ndembo Longo, J., Goldin, J. and Lukanda Muamba, V., 2014. Socioeconomic impacts of floods and droughts in the middle Zambezi river basin. *Int. J. Clim. Change Strateg. Manage*, 6, pp.131-44.
- Boukhris, O.E.F., 2008. The impact of climate change on the hydrology in highly urbanised Belgian areas. In *Water and Urban Development Paradigms* (pp. 289-294). CRC Press.
- Brammer, H., 2016. Floods, cyclones, drought and climate change in Bangladesh: a reality check. *International Journal of Environmental Studies*, 73(6), pp.865-886.
- Budhakooncharoen, S., 2003. Floods and droughts: sustainable prevention and management. *WIT Transactions on Ecology and the Environment*, 64.
- Cai, J., Kumm, M., Niva, V., Guillaume, J.H. and Varis, O., 2018. Exposure and resilience of China's cities to floods and droughts: A double-edged sword. *International Journal of Water Resources Development*, 34(4), pp.547-565.
- Chaney, N.W., Herman, J.D., Reed, P.M. and Wood, E.F., 2015. Flood and drought hydrologic monitoring: the role of model parameter uncertainty. *Hydrology and Earth System Sciences*, 19(7), pp.3239-3251.
- Chen, C., Doherty, M., Coffee, J., Wong, T. and Hellmann, J., 2016. Measuring the adaptation gap: A framework for evaluating climate hazards and opportunities in urban areas. *Environmental Science & Policy*, 66, pp.403-419.
- Chen, X., Jiang, J. and Li, H., 2018. Drought and flood monitoring of the Liao River Basin in Northeast China using extended GRACE data. *Remote Sensing*, 10(8), p.1168.
- Chen, Z. and Yang, G., 2014. Analysis of historical meteorological drought and flood hazards in the area of Shanghai City, China, in the context of climatic change. *Episodes*, 37(3), pp.182-189.
- Chou, J., Xian, T., Dong, W. and Xu, Y., 2019. Regional temporal and spatial trends in drought and flood disasters in China and assessment of economic losses in recent years. *Sustainability*, 11(1), p.55.
- Christenson, E., Elliott, M., Banerjee, O., Hamrick, L. and Bartram, J., 2014. Climate-related hazards: A method for global assessment of urban and rural population exposure to cyclones, droughts, and floods. *International journal of environmental research and public health*, 11(2), pp.2169-2192.
- Commander, D.P., 2014. Drought and flooding rains: Western Australian water resources at the start of the 21st Century.
- Correa, S.W., de Paiva, R.C.D., Espinoza, J.C. and Collischonn, W., 2017. Multi-decadal Hydrological Retrospective: Case study of Amazon floods and droughts. *Journal of Hydrology*, 549, pp.667-684.
- Cui, B., Wang, C., Tao, W. and You, Z., 2009. River channel network design for drought and flood control: A case study of Xiaqinghe River basin, Jinan City, China. *Journal of environmental management*, 90(11), pp.3675-3686.
- De Silva, M.M.G.T. and Kawasaki, A., 2018. Socioeconomic vulnerability to disaster risk: a case study of flood and drought impact in a rural Sri Lankan community. *Ecological Economics*, 152, pp.131-140.
- Denaro, S., Castelletti, A., Giuliani, M. and Characklis, G., 2020. Insurance portfolio diversification through bundling for competing agents exposed to uncorrelated drought and flood risks. *Water Resources Research*, 56(5), p.e2019WR026443.
- Dhanya, C.T. and Nagesh Kumar, D., 2009. Data mining for evolution of association rules for droughts and floods in India using climate inputs. *Journal of Geophysical Research: Atmospheres*, 114(D2).
- Di Baldassarre, G., Martinez, F., Kalantari, Z. and Viglione, A., 2017. Drought and flood in the Anthropocene: feedback mechanisms in reservoir operation. *Earth System Dynamics*, 8(1), pp.225-233.

- Du, J., Fang, J., Xu, W. and Shi, P., 2013. Analysis of dry/wet conditions using the standardized precipitation index and its potential usefulness for drought/flood monitoring in Hunan Province, China. *Stochastic environmental research and risk assessment*, 27(2), pp.377-387.
- Engeland, K., Hisdal, H. and Frigessi, A., 2004. Practical extreme value modelling of hydrological floods and droughts: a case study. *Extremes*, 7(1), pp.5-30.
- Espinoza, J.C., Ronchail, J., Guyot, J.L., Junquas, C., Drapeau, G., Martinez, J.M., Santini, W., Vauchel, P., Lavado, W., Ordoñez, J. and Espinoza, R., 2012. From drought to flooding: understanding the abrupt 2010–11 hydrological annual cycle in the Amazonas River and tributaries. *Environmental Research Letters*, 7(2), p.024008.
- Fan, H., Zhang, Z.Z., Wu, F., Xu, J.X., Shen, D.F. and Yuan, Y.J., 2019. Spatial and temporal evolution characteristics of drought-flood abrupt alternation in Guizhou province in recent 50 years based on DWAAI index. *Applied Ecology and Environmental Research*, 17(5), pp.12227-12244.
- Felzer, B.S., Ember, C.R., Cheng, R. and Jiang, M., 2020. The relationships of extreme precipitation and temperature events with ethnographic reports of droughts and floods in nonindustrial societies. *Weather, Climate, and Society*, 12(1), pp.135-148.
- Fu, C. and Zeng, Z., 2005. Correlations between North Atlantic Oscillation index in winter and eastern China flood/drought index in summer in the last 530 years. *Chinese Science Bulletin*, 50(21), pp.2505-2516.
- Gannon, K.E., Conway, D., Pardoe, J., Ndiyoi, M., Batisani, N., Odada, E., Olago, D., Opere, A., Kgosietsile, S., Nyambe, M. and Omukuti, J., 2018. Business experience of floods and drought-related water and electricity supply disruption in three cities in sub-Saharan Africa during the 2015/2016 El Niño. *Global Sustainability*, 1.
- Gemmer, M., Jiang, T., Su, B. and Kundzewicz, Z.W., 2008. Seasonal precipitation changes in the wet season and their influence on flood/drought hazards in the Yangtze River Basin, China. *Quaternary International*, 186(1), pp.12-21.
- Giuliani, G. and Peduzzi, P., 2011. The PREVIEW Global Risk Data Platform: a geoportal to serve and share global data on risk to natural hazards. *Natural Hazards and Earth System Sciences*, 11(1), pp.53-66.
- Grasham, C.F., Korzenevica, M. and Charles, K.J., 2019. On considering climate resilience in urban water security: A review of the vulnerability of the urban poor in sub-Saharan Africa. *Wiley Interdisciplinary Reviews: Water*, 6(3), p.e1344.
- Grobicki, A., MacLeod, F. and Pischke, F., 2015. Integrated policies and practices for flood and drought risk management. *Water Policy*, 17(S1), pp.180-194.
- Guerreiro, S.B., Dawson, R.J., Kilsby, C., Lewis, E. and Ford, A., 2018. Future heat-waves, droughts and floods in 571 European cities. *Environmental Research Letters*, 13(3), p.034009.
- Güneralp, B., Güneralp, İ. and Liu, Y., 2015. Changing global patterns of urban exposure to flood and drought hazards. *Global environmental change*, 31, pp.217-225.
- Hasegawa, A., Gusyev, M. and Iwami, Y., 2016. Meteorological drought and flood assessment using the comparative SPI approach in Asia under climate change. *Journal of Disaster Research*, 11(6), pp.1082-1090.
- He, W., Zhao, S., Liu, Q., Jiang, Y. and Deng, B., 2016. Long-range correlation in the drought and flood index from 1470 to 2000 in eastern China. *International Journal of Climatology*, 36(4), pp.1676-1685.
- Head, B.W., 2014. Managing urban water crises: adaptive policy responses to drought and flood in Southeast Queensland, Australia. *Ecology and Society*, 19(2).
- Hirabayashi, Y., Kanae, S., Emori, S., Oki, T. and Kimoto, M., 2008. Global projections of changing risks of floods and droughts in a changing climate. *Hydrological sciences journal*, 53(4), pp.754-772.

Hoa, N.T. and Vinh, N.Q., 2018, April. The notions of resilience in spatial planning for drought-flood coexistence (DFC) at regional scale. In IOP Conference Series: Earth and Environmental Science (Vol. 143, No. 1, p. 012066). IOP Publishing.

Hrdinka, T., Novický, O., Hanslík, E. and Rieder, M., 2012. Possible impacts of floods and droughts on water quality. *Journal of Hydro-environment Research*, 6(2), pp.145-150.

Hu, X., Hall, J.W., Shi, P. and Lim, W.H., 2016. The spatial exposure of the Chinese infrastructure system to flooding and drought hazards. *Natural Hazards*, 80(2), pp.1083-1118.

Huang, S., Krysanova, V. and Hattermann, F., 2015. Projections of climate change impacts on floods and droughts in Germany using an ensemble of climate change scenarios. *Regional environmental change*, 15(3), pp.461-473.

Hurlbert, M. and Gupta, J., 2016. Adaptive governance, uncertainty, and risk: policy framing and responses to climate change, drought, and flood. *Risk Analysis*, 36(2), pp.339-356.

Ji, Z., Li, N. and Wu, X., 2018. Threshold determination and hazard evaluation of the disaster about drought/flood sudden alternation in Huaihe River basin, China. *Theoretical and Applied Climatology*, 133(3), pp.1279-1289.

Securing, W., International Congress on Irrigation and Drainage.

Jun, K.S., Chung, E.S., Sung, J.Y. and Lee, K.S., 2011. Development of spatial water resources vulnerability index considering climate change impacts. *Science of the total environment*, 409(24), pp.5228-5242.

Kalantari, Z., Ferreira, C.S.S., Keesstra, S. and Destouni, G., 2018. Nature-based solutions for flood-drought risk mitigation in vulnerable urbanizing parts of East-Africa. *Current Opinion in Environmental Science & Health*, 5, pp.73-78.

KAMANGA, T.F., TANTANEE, S., MWALE, F.D. and BURANAJARUKORN, P., 2020. A MULTI HAZARD PERSPECTIVE IN FLOOD AND DROUGHT VULNERABILITY: CASE STUDY OF MALAWI. *Geographia Technica*, 15(1).

Kim, S., Kwak, J., Noh, H.S. and Kim, H.S., 2014. Evaluation of drought and flood risks in a multipurpose dam under climate change: a case study of Chungju Dam in Korea. *Natural hazards*, 73(3), pp.1663-1678.

Kourgialas, N.N., 2021. Hydroclimatic impact on mediterranean tree crops area–Mapping hydrological extremes (drought/flood) prone parcels. *Journal of Hydrology*, 596, p.125684.

Romero Lankao, P., 2010. Water in Mexico City: what will climate change bring to its history of water-related hazards and vulnerabilities?. *Environment and urbanization*, 22(1), pp.157-178.

Lassa, J.A. and Nugraha, E., 2014. Building Urban Resilience to Climate Change in the Secondary Cities in Indonesia. IRGSC.

Lee, K., Chun, H. and Song, J., 2018. New Strategies for Resilient Planning in response to Climate Change for Urban Development. *Procedia engineering*, 212, pp.840-846.

Lehner, B., Döll, P., Alcamo, J., Henrichs, T. and Kaspar, F., 2006. Estimating the impact of global change on flood and drought risks in Europe: a continental, integrated analysis. *Climatic Change*, 75(3), pp.273-299.

Leitner, M., Babčický, P., Schinko, T. and Glas, N., 2020. The status of climate risk management in Austria. Assessing the governance landscape and proposing ways forward for comprehensively managing flood and drought risk. *Climate Risk Management*, p.100246.

Hong-yan, L., Li-jun, X. and Xiao-jun, W., 2015. Relationship between solar activity and flood/drought disasters of the Second Songhua river basin. *Journal of Water and Climate Change*, 6(3), pp.578-585.

- Li, J., Zhang, Q., Chen, Y.D. and Singh, V.P., 2015. Future joint probability behaviors of precipitation extremes across China: spatiotemporal patterns and implications for flood and drought hazards. *Global and Planetary Change*, 124, pp.107-122.
- Liang, C., Li, D., Yuan, Z., Liao, Y., Nie, X., Huang, B., Wu, X. and Xie, Z., 2019. Assessing urban flood and drought risks under climate change, China. *Hydrological Processes*, 33(9), pp.1349-1361.
- Liu, M., Yin, Y., Ma, X., Zhang, Z., Wang, G. and Wang, S., 2020. Encounter probability and risk of flood and drought under future climate change in the two tributaries of the Rao River basin, China. *Water*, 12(1), p.104.
- Liu, Y., You, M., Zhu, J., Wang, F. and Ran, R., 2019. Integrated risk assessment for agricultural drought and flood disasters based on entropy information diffusion theory in the middle and lower reaches of the Yangtze River, China. *International Journal of Disaster Risk Reduction*, 38, p.101194.
- Madonsela, B., Koop, S., Van Leeuwen, K. and Carden, K., 2019. Evaluation of water governance processes required to transition towards water sensitive urban design—An indicator assessment approach for the City of Cape Town. *Water*, 11(2), p.292.
- Marengo, J.A. and Espinoza, J.C., 2016. Extreme seasonal droughts and floods in Amazonia: causes, trends and impacts. *International Journal of Climatology*, 36(3), pp.1033-1050.
- Markantonis, V., Farinosi, F., Dondeynaz, C., Amezttoy, I., Pastori, M., Marletta, L., Ali, A. and Carmona Moreno, C., 2018. Assessing floods and droughts in the Mékrou River basin (West Africa): a combined household survey and climatic trends analysis approach. *Natural Hazards and Earth System Sciences*, 18(4), pp.1279-1296.
- Masood, M. and Takeuchi, K., 2015. Climate Change Impact on the Manageability of Floods and Droughts of the Ganges-Brahmaputra-Meghna Basins Using Flood Duration Curves and Drought Duration Curves. *Journal of Disaster Research*, 10(5), pp.991-1000.
- McMartin, D.W., Merino, B.H.H., Bonsal, B., Hurlbert, M., Villalba, R., Ocampo, O.L., Upegui, J.J.V., Poveda, G. and Sauchyn, D.J., 2018. Limitations of water resources infrastructure for reducing community vulnerabilities to extremes and uncertainty of flood and drought. *Environmental management*, 62(6), pp.1038-1047.
- Modarres, R., Sarhadi, A. and Burn, D.H., 2016. Changes of extreme drought and flood events in Iran. *Global and Planetary Change*, 144, pp.67-81.
- Nie, N., Zhang, W., Guo, H. and Ishwaran, N., 2015. 2010–2012 drought and flood events in the Amazon Basin inferred by GRACE satellite observations. *Journal of Applied Remote Sensing*, 9(1), p.096023.
- Niu, T., Wang, J., Yang, Y., Liu, H., Chen, M. and Liu, J., 2013. Development of a meteorological and hydrological coupling index for droughts and floods along the Yangtze River valley of China. *Advances in Atmospheric Sciences*, 30(6), pp.1653-1662.
- Parasiewicz, P., King, E.L., Webb, J.A., Piniewski, M., Comoglio, C., Wolter, C., Buijse, A.D., Bjerklie, D., Vezza, P., Melcher, A. and Suska, K., 2019. The role of floods and droughts on riverine ecosystems under a changing climate. *Fisheries Management and Ecology*, 26(6), pp.461-473.
- Pavelic, P., Brindha, K., Amarnath, G., Eriyagama, N., Muthuwatta, L., Smakhtin, V., Gangopadhyay, P.K., Malik, R.P.S., Mishra, A., Sharma, B.R. and Hanjra, M.A., 2015. Controlling floods and droughts through underground storage: From concept to pilot implementation in the Ganges River Basin (Vol. 165). *International Water Management Institute (IWMI)*.
- Quesada-Montano, B., Di Baldassarre, G., Rangelcroft, S. and Van Loon, A.F., 2018. Hydrological change: Towards a consistent approach to assess changes on both floods and droughts. *Advances in water resources*, 111, pp.31-35.
- Ramyar, R. and Zarghami, E., 2017. Green infrastructure contribution for climate change adaptation in urban landscape context. *Applied Ecology and Environmental Research*, 15(3), pp.1193-1209.

- Raso, L., Chiavico, M. and Dorchies, D., 2019. Optimal and centralized reservoir management for drought and flood protection on the Upper Seine–Aube river system using stochastic dual dynamic programming. *Journal of Water Resources Planning and Management*, 145(3), p.05019002.
- Remondi, F., Burlando, P. and Vollmer, D., 2016. Exploring the hydrological impact of increasing urbanisation on a tropical river catchment of the metropolitan Jakarta, Indonesia. *Sustainable Cities and Society*, 20, pp.210-221.
- Ren, K., Huang, Q., Huang, S., Ming, B. and Leng, G., 2021. Identifying complex networks and operating scenarios for cascade water reservoirs for mitigating drought and flood impacts. *Journal of Hydrology*, 594, p.125946.
- Revi, A., 2008. Climate change risk: an adaptation and mitigation agenda for Indian cities. *Environment and urbanization*, 20(1), pp.207-229.
- Richts, A. and Vrba, J., 2016. Groundwater resources and hydroclimatic extremes: mapping global groundwater vulnerability to floods and droughts. *Environmental Earth Sciences*, 75(10), p.926.
- Rijke, J., Farrelly, M., Brown, R. and Zevenbergen, C., 2013. Configuring transformative governance to enhance resilient urban water systems. *Environmental Science & Policy*, 25, pp.62-72.
- Rijke, J., Smith, J.V., Gersonius, B., van Herk, S., Pathirana, A., Ashley, R., Wong, T. and Zevenbergen, C., 2014. Operationalising resilience to drought: Multi-layered safety for flooding applied to droughts. *Journal of Hydrology*, 519, pp.2652-2659.
- Rose, C.B. and Walker, L., 2014. Inland waterway systems-a solution to drought and flooding issues. *Water Resources in the Built Environment*; John Wiley & Sons Ltd.: Chichester, UK, pp.180-195.
- Rudiarto, I., Handayani, W. and Sih Setyono, J., 2018. A regional perspective on urbanization and climate-related disasters in the northern coastal region of central Java, Indonesia. *land*, 7(1), p.34.
- Samu, R. and Akintuğ, B., 2020. Pre-disaster planning and preparedness: drought and flood forecasting and analysis in Zimbabwe. *Water SA*, 46(3), pp.448-457.
- Smith, C. and Lawson, N., 2012. Identifying extreme event climate thresholds for greater Manchester, UK: examining the past to prepare for the future. *Meteorological Applications*, 19(1), pp.26-35.
- Stavenhagen, M., 2017. 'Impacts of droughts and floods in cities: policies and governance', *World Water Week*, Stockholm, 31 August 2016.
- Strnad, F., Moravec, V., Markonis, Y., Máca, P., Masner, J., Stočes, M. and Hanel, M., 2020. An index-flood statistical model for hydrological drought assessment. *Water*, 12(4), p.1213.
- Summers, J.K., Smith, L.M., Harwell, L.C. and Buck, K.D., 2017. Conceptualizing holistic community resilience to climate events: Foundation for a climate resilience screening index. *GeoHealth*, 1(4), pp.151-164.
- Sun, Q.Y., Li, X.Y. and Yu, F., 2016. Designing an emergency continuity plan for a megacity government: a conceptual framework for coping with natural catastrophes. *International Journal of Critical Infrastructure Protection*, 13, pp.28-35.
- Tang, J. and Cao, H., 2020. Drought and flood occurrences in the Lancang River Basin during the last 60 years: their variations and teleconnections with monsoons. *Journal of Water and Climate Change*, 11(4), pp.1798-1810.
- Tapia, C., Abajo, B., Feliu, E., Mendizabal, M., Martinez, J.A., Fernández, J.G., Laburu, T. and Lejarazu, A., 2017. Profiling urban vulnerabilities to climate change: An indicator-based vulnerability assessment for European cities. *Ecological indicators*, 78, pp.142-155.
- Miao, T., Zhiming, W., Kun, Y. and Jingjing, W., 2017, August. Study on the precipitation temperature index and its application in drought and flood disasters. In 2017 6th International Conference on Agro-Geoinformatics (pp. 1-4). IEEE.

- Tinard, P., Wang, Z.X., Moncoulon, D., Veysseire, M., Regimbeau, F. and Déqué, M., 2016. Coupling a global climatic model with insurance impact models for flood and drought: an estimation of the financial impact of climate change. In *E3S Web of Conferences* (Vol. 7, p. 02003). EDP Sciences.
- Unami, K., Abagale, F.K., Yangyuoru, M., Alam, A.H.M.B. and Kranjac-Berisavljevic, G., 2010. A stochastic differential equation model for assessing drought and flood risks. *Stochastic environmental research and risk assessment*, 24(5), pp.725-733.
- Visser-Quinn, A., Beevers, L., Collet, L., Formetta, G., Smith, K., Wanders, N., Thober, S., Pan, M. and Kumar, R., 2019. Spatio-temporal analysis of compound hydro-hazard extremes across the UK. *Advances in Water Resources*, 130, pp.77-90.
- Voskamp, I.M. and Van de Ven, F.H., 2015. Planning support system for climate adaptation: Composing effective sets of blue-green measures to reduce urban vulnerability to extreme weather events. *Building and Environment*, 83, pp.159-167.
- Wang, X. and Xie, H., 2018. A review on applications of remote sensing and geographic information systems (GIS) in water resources and flood risk management. *Water*, 10(5), p.608.
- Surmaini, E., Susanti, E., Sarvina, Y. and Syahputra, M.R., 2018. Development of Early Detection Method for Drought and Flood on Rice Paddy. *Agromet*, 32(2), pp.81-92.
- Ward, P.J., de Ruiter, M.C., Mård, J., Schröter, K., Van Loon, A., Veldkamp, T., von Uexkull, N., Wanders, N., AghaKouchak, A., Arnbjerg-Nielsen, K. and Capewell, L., 2020. The need to integrate flood and drought disaster risk reduction strategies. *Water Security*, 11, p.100070.
- Wheater, H.S., 2015. Water Security—science and management challenges. *Proceedings of the International Association of Hydrological Sciences*, 366, pp.23-30.
- Winsemius, H.C., Jongman, B., Veldkamp, T.I., Hallegatte, S., Bangalore, M. and Ward, P.J., 2018. Disaster risk, climate change, and poverty: assessing the global exposure of poor people to floods and droughts. *Environment and Development Economics*, 23(3), pp.328-348.
- Worku, H., 2017. Integrating climate change adaptation strategies in urban planning and landscape design of Addis Ababa City, Ethiopia: Using urban planning and landscape design to mitigate flooding, drought, and urban heat island effects. *Environmental quality management*, 27(1), pp.5-21.
- Wu, S., Zhang, X. and She, D., 2017. Joint pattern of seasonal hydrological droughts and floods alternation in China's Huai River Basin using the multivariate L-moments. *Journal of Earth System Science*, 126(4), pp.1-17.
- Xenarios, S., Nemes, A., Sarker, G.W. and Sekhar, N.U., 2016. Assessing vulnerability to climate change: Are communities in flood-prone areas in Bangladesh more vulnerable than those in drought-prone areas?. *Water Resources and Rural Development*, 7, pp.1-19.
- Yan, D.H., Han, D.M., Wang, G., Yuan, Y., Hu, Y. and Fang, H.Y., 2014. The evolution analysis of flood and drought in Huai River Basin of China based on monthly precipitation characteristics. *Natural hazards*, 73(2), pp.849-858.
- Yang, T.H. and Liu, W.C., 2020. A general overview of the risk-reduction strategies for floods and droughts. *Sustainability*, 12(7), p.2687.
- Yang, Y., Weng, B., Bi, W., Xu, T., Yan, D. and Ma, J., 2019. Climate change impacts on drought-flood abrupt alternation and water quality in the Hetao Area, China. *Water*, 11(4), p.652.
- Zarezadeh, V. and Giacomoni, M., 2017. Incorporating dynamic land use change into hydrologic model to assess urbanization effects on hydrologic flow regime. In *World Environmental and Water Resources Congress 2017* (pp. 22-32).

Zhang, M., Liu, Z. and van Dijk, M.P., 2019. Measuring urban vulnerability to climate change using an integrated approach, assessing climate risks in Beijing. *PeerJ*, 7, p.e7018.

Zhou, H., Luo, Z., Tangdamrongsub, N., Wang, L., He, L., Xu, C. and Li, Q., 2017. Characterizing drought and flood events over the Yangtze River Basin using the HUST-Grace2016 solution and ancillary data. *Remote Sensing*, 9(11), p.1100.

Zong, H. and Zhang, Q., 2011. A new precipitation index for the spatiotemporal distribution of drought and flooding in the reaches of the Yangtze and Huaihe Rivers and related characteristics of atmospheric circulation. *Advances in Atmospheric Sciences*, 28(2), pp.375-386.

Jia, H. and Pan, D., 2013. On the spatial and temporal patterns of flood and drought hazards of China. *Disaster advances*, 6(3), pp.12-18.

Jin, J.L., Song, Z.Z. and Zhou, Y.L., 2015. Risk assessment method system for flood and drought disasters and its application. *Adv Sci Technol Water Resour*, 35(5), pp.142-151.

Markanday, A., Galarraga, I. and Markandya, A., 2019. A critical review of cost-benefit analysis for climate change adaptation in cities. *Climate Change Economics*, 10(04), p.1950014.

Zhao, Y., Weng, Z., Chen, H. and Yang, J., 2020. Analysis of the evolution of drought, flood, and drought-flood abrupt alternation events under climate change using the daily SWAP index. *Water*, 12(7), p.1969.
